# Supplementary material for: Brain Metastases Exhibit Distinct Spatial Patterns of Resident and Infiltrating Macrophages
Source: Research Square preprint supplement (doi:10.21203/rs.3.rs-8294376/v1), 2025-12-13
Supplement: Supplementary file 1 [file 64ae25f5fe8c18229584e60f.docx]

**Table 2. Expression levels of CD11b, CD45, *Cx3cr1*-GFP, F4/80, and CD38 in MDM (Q2) and MG (Q3) subpopulations (i-iii) from sham- D122-, and Ret-BrM brains, as assessed by flow cytometry.**

|  |  | **CD11b** | **CD45** | **Cx3cr1-GFP** | **F4/80** | **CD38** |
| --- | --- | --- | --- | --- | --- | --- |
| **MDM**  **Q2i** | Sham | **Int** (209684) | **Int** (63344) | **Int** (522040) | **Int** (1442) | **Int/-** (708) |
| D122 | **Int** (274836) | **Int** (84354) | **Int** (241178) | **Int** (1829) | **Int/-** (1006) |
| Ret | **Int** (257368) | **Int** (82977) | **Int** (192643) | **Int** (1755) | **Int/-** (895) |
| **MDM Q2ii** | D122 | **Int** (184832) | **High** (170208) | **Low** (159418) | **Int** (1960) | **Int** (2514) |
| Ret | **Int** (190568) | **High** (142392) | **Low** (182774) | **Int** (1170) | **Int** (1717) |
| **MDM Q2iii** | D122 | **High** (819400) | **High** (225284) | **High** (986876) | **High** (6192) | **High** (3526) |
| Ret | **High** (686500) | **High** (202648) | **High** (727166) | **High** (4865) | **High** (2625) |
| **MG**  **Q3i** | Sham | **Low** (84982) | **Low** (13584) | **High** (1046750) | **Low** (647) | **Low** (241) |
| D122 | **Low** (98554) | **Low** (21413) | **High** (833200) | **Low** (689) | **Low** (337) |
| Ret | **Low** (88041) | **Low** (16205) | **High** (854000) | **Low** (701) | **Low** (313) |
| **MG**  **Q3ii** | D122 | **Low** (87032) | **High** (121399) | **Low** (220206) | **Low** (984) | **High** (1714) |
| Ret | **Low** (96857) | **High** (102507) | **Low** (168644) | **Low** (881) | **High** (1175) |
| **MG**  **Q3iii** | D122 | **High** (511333) | **High** (141892) | **High** (1042506) | **High** (3361) | **High** (2265) |
| Ret | **High** (482428) | **High** (131354) | **High** (3312806) | **High** (2553) | **High** (1713) |

**Table 2. Expression levels of CD11b, CD45, *Cx3cr1*-GFP, F4/80, and CD38 in MDM (Q2) and MG (Q3) subpopulations (i-iii) from sham- D122-, and Ret-BrM brains, as assessed by flow cytometry.**

The table presents the mean fluorescence intensity (MFI) values corresponding to Figure 7E. The relative annotations *low*, *int*, and *high* refer to the expression level of each protein across the different macrophage subtypes in sham-, D122-, and Ret-BrM-bearing brains. The analysis reveals the following classification:

MDM: Q2/i, (CD11bint/CD45int/*Cx3cr1*-GFPint/F4/80int/CD38int/−); Q2/ii, (CD11bint/CD45high/*Cx3cr1*-GFPlow/F4/80int/CD38int); and Q2/iii, (CD11bhigh/CD45high/*Cx3cr1*-GFPhigh/F4/80high/CD38high).

MG: Q3/i (CD11blow/CD45low/*Cx3cr1*-GFPhigh/F4/80low/CD38low); Q3/ii (CD11blow/CD45high/*Cx3cr1*-GFPlow/F4/80low/CD38high) and Q3/iii (CD11bhigh/CD45high/*Cx3cr1*-GFPhigh/F4/80high/CD38high).
