# Supplementary material for: Brain Metastases Exhibit Distinct Spatial Patterns of Resident and Infiltrating Macrophages
Source: Research Square preprint supplement (doi:10.21203/rs.3.rs-8294376/v1), 2025-12-13
Supplement: Supplementary file 3 [file ada184fade499103e4e34840.docx]

|  | **Q2 (MDM)** | | | **Q3 (MG)** | | |
| --- | --- | --- | --- | --- | --- | --- |
|  | Q2i | Q2ii | Q2iii | Q3i | Q3ii | Q3iii |
| **Sham** | 91.60% | 0.12% | 7.46% | 92.40% | 0.44% | 7.23% |
| **D122** | 67.86% | 1.39% | 31.06% | 65.30% | 16.71% | 17.76% |
| **Ret** | 70.28% | 5.25% | 24.75% | 75.60% | 12.58% | 11.14% |

**Table 1. Percentage of MDM (Q2) and MG (Q3) subpopulations (Q2 i-iii and Q3 i-iii) in sham-, D122-, and Ret-injected brains of *Ms4a3cre:R26tdT:Cx3cr1Gfp* mice, as quantified by flow cytometry.**
